# Supplementary material for: Rutin detection using highly electrochemical sensing amplified by an Au–Ag nanoring decorated N-doped graphene nanosheet
Source: Royal Society of Chemistry journal article supplement (doi:10.1039/c6ra22264a), 2016-01-01
Supplement: c6ra22264a1.pdf [file c6ra22264a1.pdf]

## Electronic Supplementary Information

### Rutin detection with highly electrochemical sensing amplified by Au-Ag nanorings decorated N-doped graphene nanosheet

Cui'e Zou, Duan Bin, Beibei Yang, Ke Zhang and Yukou Du\*

College of Chemistry, Chemical Engineering and Materials Science, Soochow University, Suzhou  
215123, P. R. China. E-mail: [duyk@suda.edu.cn](mailto:duyk@suda.edu.cn)

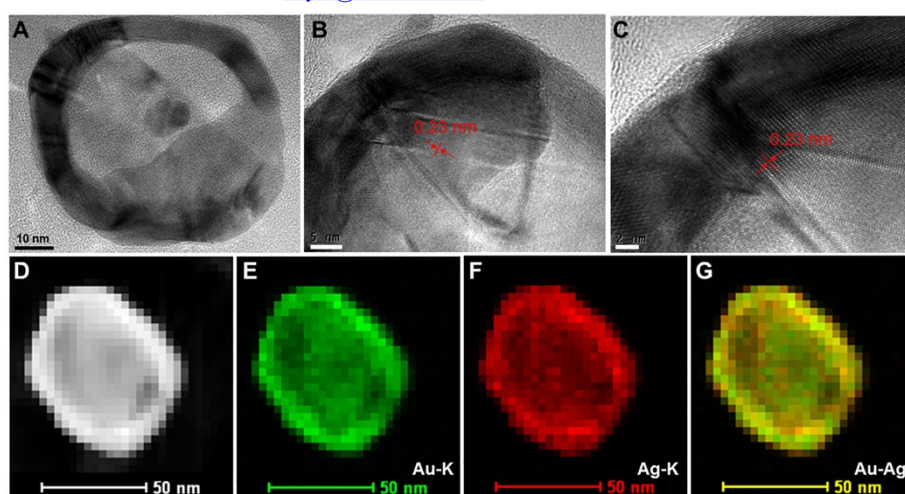

Fig. S1 High resolution TEM and HAADF-STEM-EDS mapping images of Au-Ag/NG.

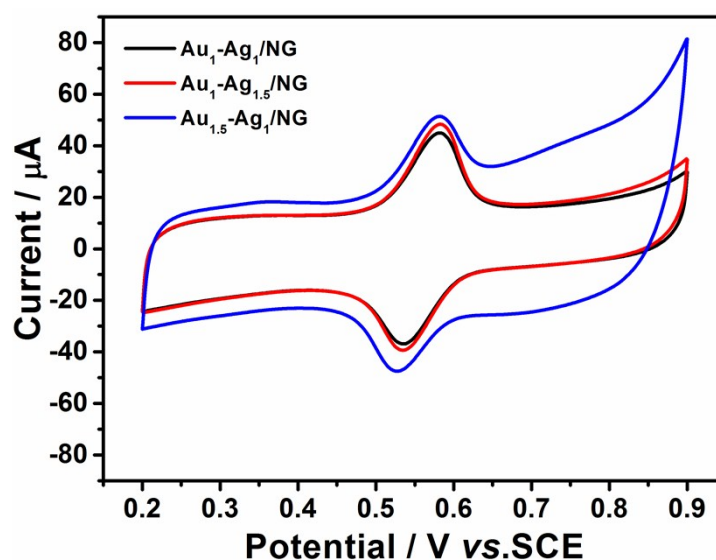

Fig. S2 CVs of Au<sub>1</sub>-Ag<sub>1</sub>/NG, Au<sub>1</sub>-Ag<sub>1.5</sub>/NG and Au<sub>1.5</sub>-Ag<sub>1</sub>/NG electrodes recorded in 0.1 M PBS (pH=3.0) containing 0.1 mM rutin.

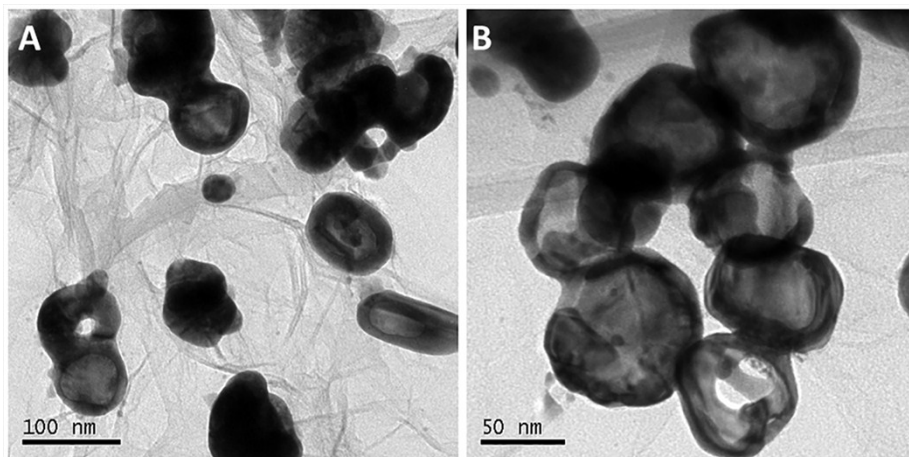

Fig. S3 TEM images of Au-Ag/NG catalyst after 500 cycles of CV in 0.1 M PBS (pH=3.0) containing 0.1 mM rutin.
